# Supplementary material for: A simple pyrene “click”-type modification of DNA affects solubilisation and photoluminescence of single-walled carbon nanotubes
Source: Royal Society of Chemistry journal article supplement (doi:10.1039/c3ra00163f), 2013-01-01
Supplement: c3ra00163f.pdf [file c3ra00163f.pdf]

# A simple pyrene “click”-type modification of DNA affects solubilisation and photoluminescence of single-walled carbon nanotubes

Wolfgang Schmucker,<sup>a</sup> Stefanie Klumpp,<sup>b</sup> Frank Hennrich,<sup>c</sup> Manfred Kappes,<sup>b,c</sup> and Hans-Achim Wagenknecht<sup>a\*</sup>

<sup>a</sup> Karlsruhe Institute of Technology (KIT), Institute of Organic Chemistry, Fritz-Haber-Weg 6, 76131 Karlsruhe, Germany. Fax: +49 721 608-44825; Tel: +49 721 608-47486; E-mail: [Wagenknecht@kit.edu](mailto:Wagenknecht@kit.edu)

<sup>b</sup> Karlsruhe Institute of Technology (KIT), Institute of Physical Chemistry, Fritz-Haber-Weg 2, 76131 Karlsruhe, Germany. Fax: +49 721 608-47232; Tel: +49 721 608-42094; E-mail: [manfred.kappes@kit.edu](mailto:manfred.kappes@kit.edu)

<sup>c</sup> Karlsruhe Institute of Technology (KIT), Institute of Nanotechnology, Hermann-von-Helmholtz-Platz 1, 76344 Eggenstein-Leopoldshafen, Germany

## Supporting Information

| Contents                                                                                             | Page |
|------------------------------------------------------------------------------------------------------|------|
| Materials and Methods                                                                                | 2    |
| Synthesis of the pyrene azide <b>4</b>                                                               | 2    |
| Synthesis and Characterization of <b>DNA1–5</b>                                                      | 5    |
| SWCNT sample preparation                                                                             | 6    |
| Photoluminescence map to identify suitable oligonucleotides                                          | 6    |
| E <sub>11</sub> range for calculating the denominator for photoluminescence/absorption-ratio         | 7    |
| Photoluminescence/absorption ratios of <b>DNA1</b> vs. <b>DNA6</b> and <b>DNA5</b> vs. <b>DNA8</b> . | 8    |
| Additional references                                                                                | 8    |

## Materials and Methods

Chemicals and dry solvents were purchased from commercial suppliers and were used without further purification unless otherwise mentioned. TLC was performed on Fluka silica gel F254 coated aluminium foil. Flash chromatography was carried out with Silica Gel 60 from Aldrich (43 – 60  $\mu\text{m}$ ). Spectroscopic measurements were recorded in Na-Pi buffer solution (10 mM, pH 7) using quartz glass cuvettes ( $l = 1\text{ cm}$ ). Mass spectra were measured in the central analytical facility of the institute. NMR spectra were recorded on a Bruker Advance 300 spectrometer at 300 K in deuterated solvents. Chemical shifts are given in ppm relative to TMS. Absorption were recorded on a Perkin Elmer Lambda 750 spectrometer with a peltier system PTP 6+6. Fluorescence was measured on a Jobin-Yvon Fluoromax 3 fluorimeter with a step width of 1 nm and an integration time of 0.2 s. All spectra were recorded with an excitation and emission bypass of 5 nm and are corrected for Raman emission of the buffer solution. The pyrene azide **4** was synthesized according to scheme 1. The precursors **2** and **3** were synthesized according to literature.<sup>1,2</sup>

### Synthesis of the pyrene azide **4**

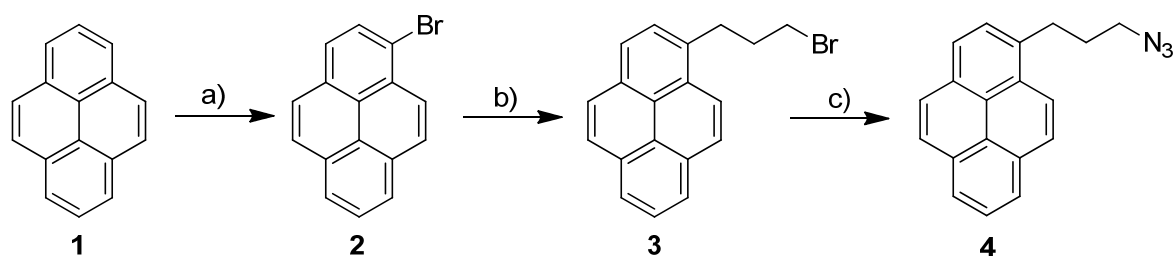

**Scheme S1:** Synthesis of the pyrene azide **4**: *Reagents and conditions*: a) HBr (1,1 eq.),  $\text{H}_2\text{O}_2$  (1 eq.), MeOH:Et<sub>2</sub>O 1:1, 15 °C – rt, 16 h, 96%; b) n-BuLi (1,2 eq.), 1,3-dibromopropane (10 eq.), abs. Et<sub>2</sub>O, 0 °C – reflux, 2 h, 18%; c) NaN<sub>3</sub> (eq.), DMF, rt, 16 h, 75%.

**1-(3-azidopropyl)-pyrene (**4**).** 100 mg (0.31 mmol) 1-(3-bromopropyl)-pyrene and 30 mg (0.18 mmol, 0.6 equiv.) KI were dissolved in 5 mL DMF. To this mixture 80 mg NaN<sub>3</sub> (1.23 mmol, 4 equiv.) were added and heated over night at 80 °C. The mixture was extracted with CH<sub>2</sub>Cl<sub>2</sub> and water. The organic layer was dried over MgSO<sub>4</sub>. Afterwards the solvent was removed and the crude product was purified by flash chromatographie (hexane: CH<sub>2</sub>Cl<sub>2</sub> 5:1) to yield **4** (68 mg, 0.24 mmol, 76%.) as a yellow oil.

**<sup>1</sup>H-NMR** (300MHz, CDCl<sub>3</sub>):  $\delta$  [ppm] 8.53 – 7.84(m, 9H), 3.42 (dt,  $J = 11.3, 4.3\text{ Hz}$ , 4H), 2.19–2.10 (m, 2H) **<sup>13</sup>C NMR** (300 MHz, CDCl<sub>3</sub>)  $\delta$  [ppm] 135.2, 131.6, 131.0, 130.2, 128.8, 127.7, 127.6, 127.5, 127.0, 126.1, 125.3, 125.2, 125.0, 123.2, 77.4, 75.0, 51.1, 30.9, 30.5. **EI-MS**  $m/z$  (%): 285.2 (50) [M]<sup>+</sup> **HR-ESI-MS**  $m/z$  (calcd.) = 286.1339 [M-H]<sup>+</sup>;  $m/z$  (found): 286.1351 [M-H]<sup>+</sup>

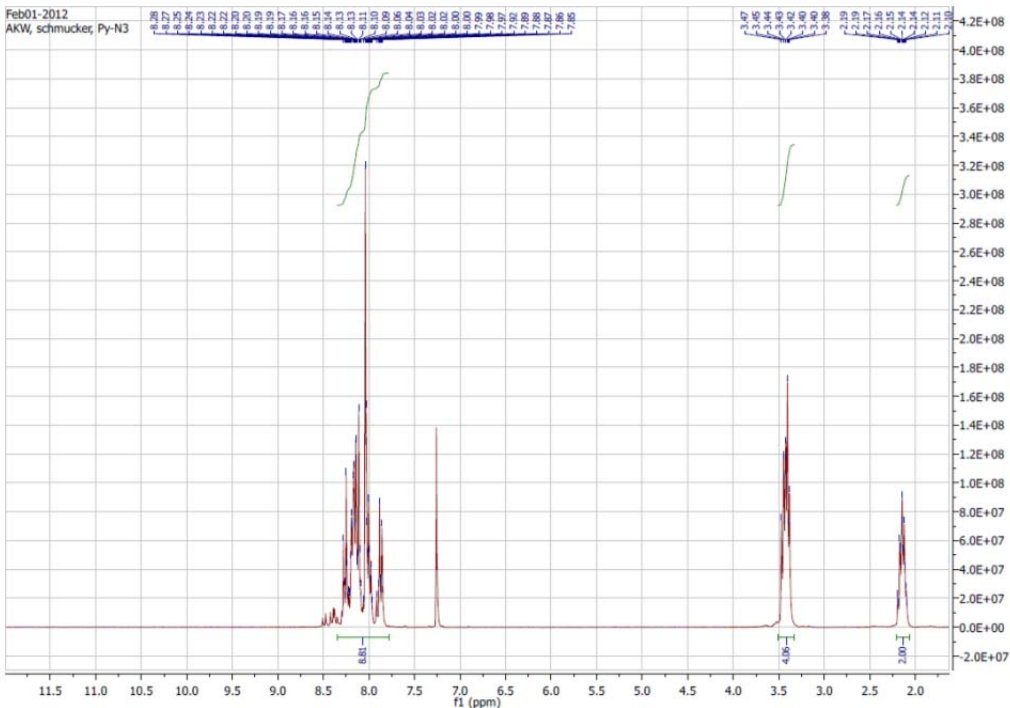

**Figure S1:** Image  $^1\text{H}$ -NMR of **4**.

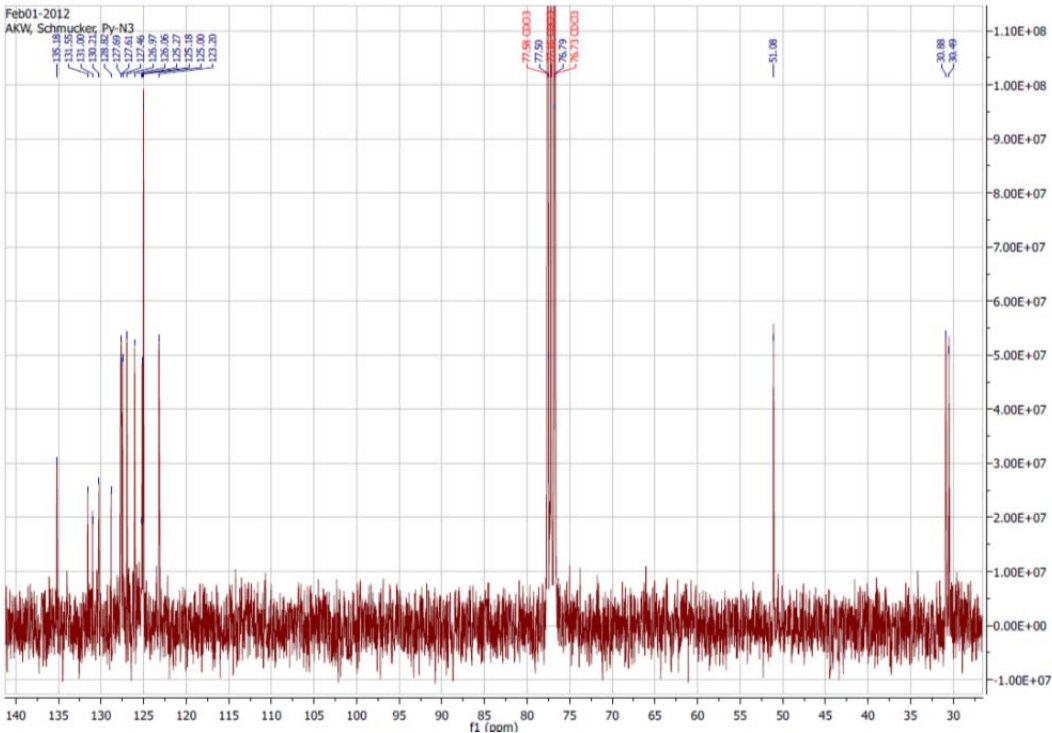

**Figure S2:** Image of  $^{13}\text{C}$ -NMR of **4**.

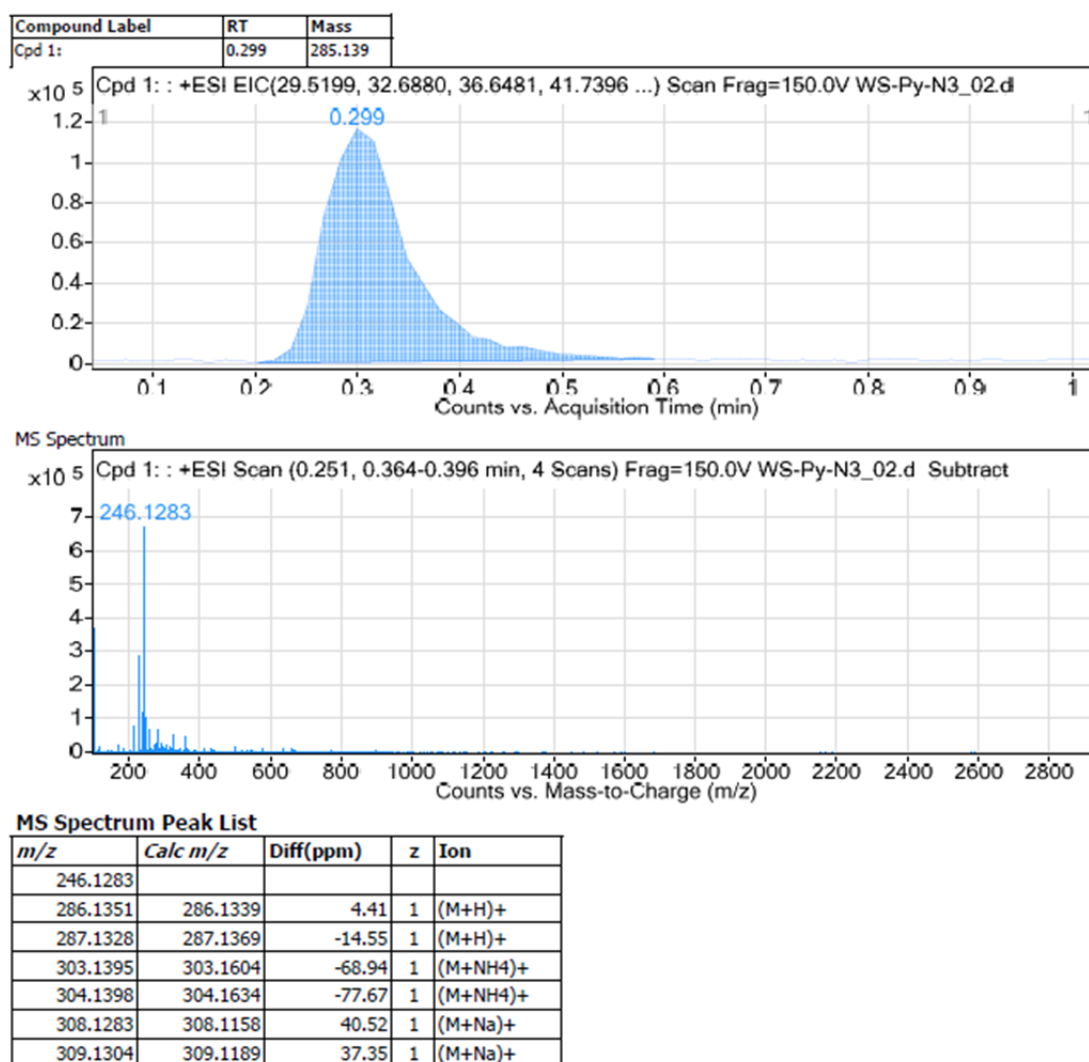

**Figure S3:** Image of HR-ESI-MS of **4**.

## Synthesis and Characterization of DNA1–5

The oligonucleotides were prepared on an Expetide 8909 DNA synthesizer (Applied Biosystems) via standard phosphoramidite protocols using CPGs (1  $\mu$ mol) with longer coupling times of 120 s. The chemicals for the DNA synthesis were purchased from ABI and Glen Research. 2'-(O-propargyl)-uridine was ordered from Chem Genes. After preparation, the trityl-off oligonucleotides were cleaved of the resin and deprotected with conc.  $\text{NH}_4\text{OH}$  at  $37^\circ\text{C}$  for 16 h. Afterwards 25  $\mu\text{L}$  of an aqueous sodium ascorbate solution (0.1 mM in water), 34  $\mu\text{L}$  tris-[(1-benzyl-1H-1,2,3-triazol-4-yl)methyl]amine (0.1 mM DMSO/ t-butanol 3:1), 17  $\mu\text{L}$  of a solution of tetrakis(acetonitrile)copper(I)hexafluorophosphate (0.1 mM DMSO/ tbutanol 3/1) and finally 114  $\mu\text{L}$  of the azide **4** (0.01 M, DMSO/t-butanol 3:1) were added to the 2'-propargyl-uridine modified DNA. The reaction mixture was vortexed, shaken overnight at r.t. and evaporated to dryness using a speedvac the next day. Then 100  $\mu\text{L}$  of an aqueous solution of sodium acetate (0.3 M) were added and the mixture stored for 1 h at r.t.. Then ethanol (1 mL) was added to the mixture, vortexed and frozen ( $-20^\circ\text{C}$ ) overnight. The suspension was centrifuged (13000 rpm, 15 min) and the supernatant removed. The pellet was washed twice with ethanol (500  $\mu\text{L}$ ) and then dissolved in water (500  $\mu\text{L}$ ). Prior to purification by HPLC, the DNA was desalted by NAP-5 column (GE Healthcare). The modified oligonucleotides were dried and purified by reversed phase HPLC using the

following conditions: A = NH<sub>4</sub>OAc buffer (50 mM), pH = 6.5; B = MeCN; gradient = 0 - 25% B over 50 min. The oligonucleotides were lyophilized and quantified by their absorbance at 260 nm on a NanoDrop ND-1000. **DNA6-8** were ordered from Metabion and used without further purification.

**Table S1** Maldi-MS analysis and extinction coefficients of **DNA1-5**

| Oligonucleotide | Calculated mass<br>[g/mol] | Observed mass<br>[m/z] | $\epsilon_{260}$ [mM <sup>-1</sup> cm <sup>-1</sup> ] |
|-----------------|----------------------------|------------------------|-------------------------------------------------------|
| <b>DNA1</b>     | 3948                       | 3947.9                 | 128.9                                                 |
| <b>DNA2</b>     | 2741                       | 2738.5                 | 78.6                                                  |
| <b>DNA3</b>     | 4062                       | 4062.8                 | 120.8                                                 |
| <b>DNA4</b>     | 3939                       | 3938.1                 | 123.0                                                 |
| <b>DNA5</b>     | 3404                       | 3401.4                 | 99.7                                                  |

### SWCNT sample preparation

In a typical experiment 60 -70 µg of as-produced HiPco SWCNTs (Nanointegris, batch number R1-912) were mixed with an equivalent mass of DNA in 2 mL of 100 mM NaCl and 5 mM NaPi-buffer pH 7 in H<sub>2</sub>O (for fluorescence) or only D<sub>2</sub>O (for photoluminescence/absorption measurements). The sample was sonicated in an ultrasonic bath (Merck eurolab, USR 18 H) for 2 hours. After sonication, the sample was incubated for 1 d. Then it was centrifuged at 15600 g for 90 min. 90% of the supernatant were collected. In fluorescence quenching experiments the supernatant was centrifuged through Amicon Ultra-0.5 mL centrifugal filters from Millipore (50 kDa, 9000 g) and washed four times with 100 mM NaCl and 5 mM NaPi. After measuring the fluorescence a few µL of a 5 wt-% SDBS solution were added and incubated for 1 h at room temperature. Afterwards the fluorescence was measured again. In photoluminescence/absorption measurements 500 µL of the supernatant mixed with an equal volume of a 2.2 wt% solution of SDBS were subsequently added to a final concentration of 0.11 wt% SDBS. After incubation for several hours at room temperature absorption- and PL- measurements were carried out.

### Photoluminescence map to identify suitable oligonucleotides

SWCNTs were solubilized in D<sub>2</sub>O in a 0.1 wt-% SDBS solution by sonication in an ultrasonic bath. After incubation and centrifugation (see experimental section) a photoluminescence map of the supernatant was acquired.

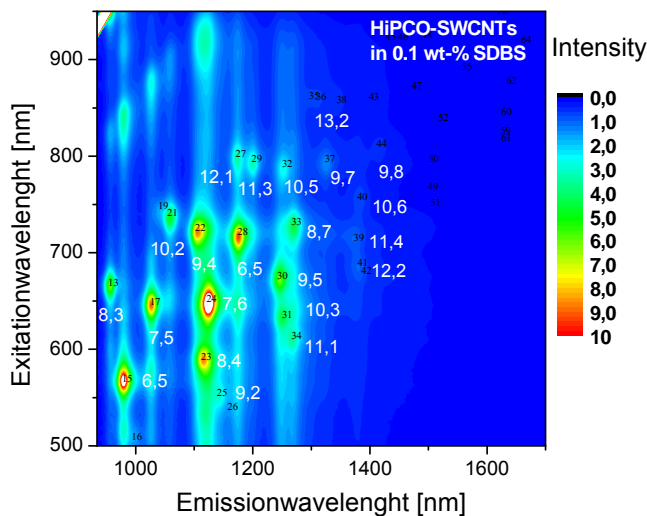

**Figure S4:** photoluminescence map of HiPCo-SWCNTs dissolved in a 0.1 wt-% SDBS solution. 22 (n,m) species can be clearly identified.

### E<sub>11</sub> range for calculating the denominator for photoluminescence/absorption-ratio

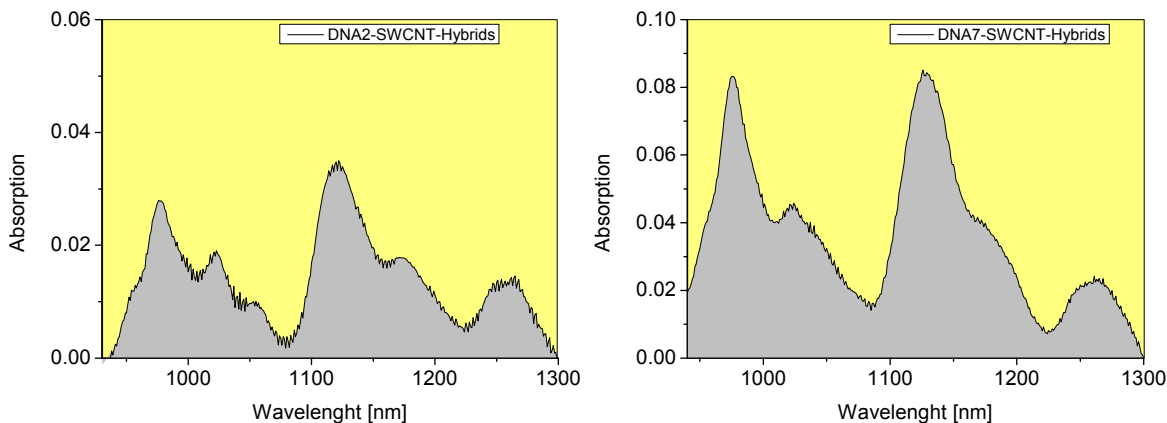

**Figure S5:** E<sub>11</sub> range for **DNA2** and **DNA7** (The observable differences in are not reproducible and hence are the result of differences in the sample concentration that are caused by the preparation (centrifugation etc.)

### Photoluminescence/absorption ratios of DNA1 vs. DNA6 and DNA5 vs. DNA8.

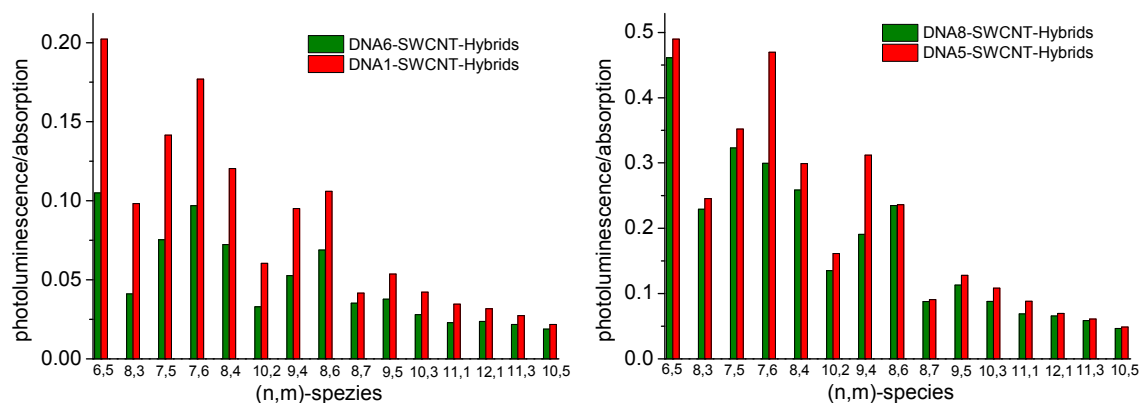

**Figure S6:** Photoluminescence/absorption of **DNA1** vs. **DNA6** and **DNA5** vs. **DNA8**.

#### Additional references

- <sup>1</sup> C. He, Q. G. He, Q. Chen, L. Shi, H. M. Cao, J. G. Cheng, C. M. Deng, T. Lin, *Tetrahedron Lett.* **2010**, *51*, 1317-1321.
- <sup>2</sup> H. W. Rhee, C. R. Lee, S. H. Cho, M. R. Song, M. Cashel, H. E. Choy, Y. J. Seok, J. I. Hong, *J. Am. Chem. Soc.* **2008**, *130*, 784-785.
